# Supplementary material for: Compilation of reported protein changes in the brain in Alzheimer’s disease
Source: PubMed Central journal article supplement (PMC10368642; doi:10.1038/s41467-023-40208-x), 2023-07-25
Supplement: 41467_2023_40208_MOESM1_ESM.pdf [file 41467_2023_40208_MOESM1_ESM.pdf]

Identification of studies via databases

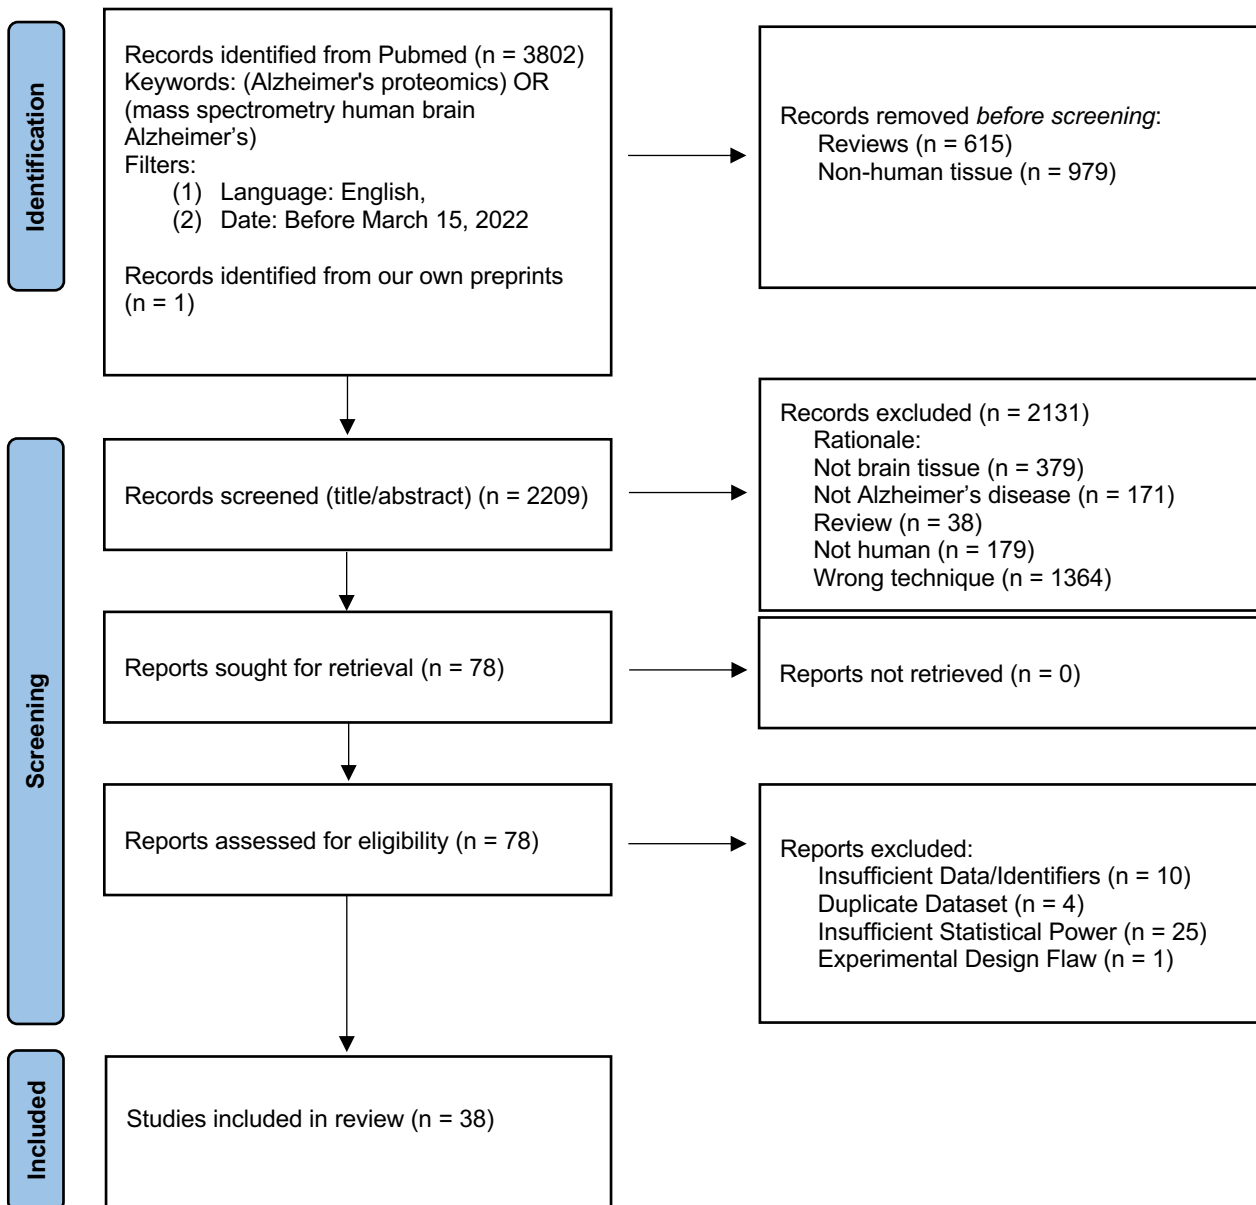

Supplementary Figure 1: PRISMA flow diagram describing systematic review process.
